# Supplementary material for: Improving communication on medical ward rounds with patients who speak limited English with implementation of medical communication charts
Source: HighWire-hosted journal article supplement (doi:10.1136/bmjoq-2021-001389), 2021-09-01
Supplement: bmjoq-2021-001389supp001_data_supplement.pdf [file bmjoq-2021-001389supp001_data_supplement.pdf]

|                                 | <b>Pre-QIP (baseline)</b> | <b>PDSA 1</b> | <b>PDSA 2</b> | <b>PDSA 3</b> |
|---------------------------------|---------------------------|---------------|---------------|---------------|
| <b>Patient age</b>              | 17-92                     | 52-90         | 52-84         | 48-74         |
| <b>Patient gender</b>           | 6F, 2M                    | 3F, 2M        | 4F, 1M        | 1F, 2M        |
| <b>Total number of patients</b> | 8                         | 5             | 5             | 3             |
| <b>Total number of doctors</b>  | 8                         | 5             | 4             | 3             |
